# Supplementary material for: A Co and Fe bimetallic MOF with enhanced electrocatalytic oxygen evolution performance: exploring the electronic environment modifications upon Fe incorporation
Source: Royal Society of Chemistry journal article supplement (doi:10.1039/d3ya00572k), 2024-01-01
Supplement: d3ya00572k2.pdf [file d3ya00572k2.pdf]

*Electronic Supporting Information (ESI)*

**A Co and Fe bimetallic MOF with enhanced electrocatalytic oxygen evolution  
performance: exploring the electronic environment modifications upon Fe  
incorporation †**

*Varsha Singh,<sup>a</sup> Devesh Kumar Singh,<sup>b</sup> Mamta Yadav,<sup>a</sup> Smita Singh,<sup>a</sup> Vikram Rathour,<sup>a</sup>  
Ananya Tiwari,<sup>a</sup> and Vellaichamy Ganesan\*<sup>a</sup>*

a: Department of Chemistry, Institute of Science, Banaras Hindu University, Varanasi-  
221005, UP, India

b: Kutir Post Graduate College, Chakkey, Jaunpur-222146, UP, India

E-mail: [velganes@yaho.com](mailto:velganes@yaho.com) and [velgan@bhu.ac.in](mailto:velgan@bhu.ac.in)

\*Corresponding author

### Calculation of turnover frequency (TOF)

The turnover frequency is calculated by measuring the cyclic voltammetry (CV) response in the non-catalytic redox region (in this case, 0.9 to 1.4 V (vs. RHE)). Half of the integrated area of the cyclic voltammogram is divided by the scan rate at which the CV is recorded (in this case, 0.02 V s<sup>-1</sup>) to get the charge.

Charge (Coulombs) = Half of the integrated area of the cyclic voltammogram (V A) /scan rate (V s<sup>-1</sup>)

Number of electrons = Charge/1.602 × 10<sup>-19</sup>

The obtained number of electrons was divided by electrons transferred in the redox reaction (in this case, 1 corresponding to Co<sup>2+</sup> to Co<sup>3+</sup>) to get the surface concentration (c)

$$\text{TOF} = (i \times N_A) / A \times F \times n \times c$$

where, i = current in A

N<sub>A</sub> = Avogadro number (6.023 × 10<sup>23</sup>)

A = Geometrical area of the electrode (here 0.196 cm<sup>2</sup>)

F = Faraday constant (96485 C)

n = number of electrons

c = surface concentration

**Table S1:** The obtained ratios of Co:Fe comprehended from ICP analysis.

| <b>Feed ratio of metal ions (Co:Fe)</b> | <b>Obtained ratio (Co:Fe)</b> |
|-----------------------------------------|-------------------------------|
| 2:1                                     | 1.7:1                         |
| 1:1                                     | 1:1.1                         |
| 1:2                                     | 1:2.2                         |

**Table S2:** XPS peak positions of elements in Co-MOF, Fe-MOF, and 2:1 Co-Fe-MOF.

| <b>Materials</b> | <b>Co-MOF</b>                     | <b>Fe-MOF</b>                     | <b>2:1 Co-Fe-MOF</b>              |
|------------------|-----------------------------------|-----------------------------------|-----------------------------------|
| <b>Elements</b>  | <b>Binding energy / eV</b>        | <b>Binding energy / eV</b>        | <b>Binding energy / eV</b>        |
| <b>C</b>         | 284.6 (Adventitious-C)            | 284.6 (Adventitious-C)            | 284.6 (Adventitious-C)            |
|                  | 285.1 (C-C)                       | 285.0 (C-C)                       | 285.2 (C-C)                       |
|                  | 285.6 (C-N)                       | 285.6 (C-N)                       | 286.1 (C-N)                       |
|                  | 286.2 (C=N-C)                     | 286.2 (C=N-C)                     | 286.8 (C=N-C)                     |
|                  | 286.9 (C-O)                       | 287.0 (C-O)                       | 286.9 (C-O)                       |
|                  | 288.8 (O-C=O)                     | 288.6 (O-C=O)                     | 288.5 (O-C=O)                     |
| <b>Co</b>        | 783.1 (Co <sup>2+</sup> )         | -                                 | 780.7 (Co <sup>3+</sup> )         |
|                  | 788.4 (Sat.)                      |                                   | 796.3 (Co <sup>3+</sup> )         |
|                  | 798.7 (Co <sup>2+</sup> )         |                                   | 786.6 (Sat.)                      |
|                  | 804.8 (Sat.)                      |                                   | 782.4 (Co <sup>2+</sup> )         |
|                  |                                   |                                   | 797.7 (Co <sup>2+</sup> )         |
|                  |                                   | 803.3 (Sat.)                      |                                   |
| <b>Fe</b>        | -                                 | 713.7 (Fe <sup>3+</sup> )         | 713.4 (Fe <sup>3+</sup> )         |
|                  |                                   | 719.2 (Sat.)                      | 726.1 (Fe <sup>3+</sup> )         |
|                  |                                   | 727.1 (Fe <sup>3+</sup> )         | 718.4 (Sat.)                      |
|                  |                                   |                                   | 711.0 (Fe <sup>2+</sup> )         |
|                  |                                   |                                   | 724.1 (Fe <sup>2+</sup> )         |
| <b>N</b>         | 399.5 (M-N)                       | 399.4 (M-N)                       | 399.4 (M-N)                       |
|                  | 400.4 (Pyridinic-N)               | 400.3 (Pyridinic-N)               | 400.3 (Pyridinic-N)               |
|                  | 407.3 (Nitrate-N)                 | 407.1 (Nitrate-N)                 | 406.7 (Nitrate-N)                 |
| <b>O</b>         | 531.1 (M-O)                       | 530.2 (M-O)                       | 530.0 (M-O)                       |
|                  | 532.9 (O-C=O)                     | 531.4 (O-C=O)                     | 531.5 (O-C=O)                     |
|                  | 533.0 (Adsorbed H <sub>2</sub> O) | 532.6 (Adsorbed H <sub>2</sub> O) | 532.6 (Adsorbed H <sub>2</sub> O) |

**Table S3:** Mass activity values ( $\text{Ag}^{-1}\text{cm}^{-2}$ ) of MOFs at various potentials.

| S. No. | MOFs          | Mass activity values at different applied potentials (V, vs. RHE) |        |        |         |
|--------|---------------|-------------------------------------------------------------------|--------|--------|---------|
|        |               | 1.54                                                              | 1.59   | 1.64   | 1.69    |
| 1.     | 2:1 Co-Fe-MOF | 173.89                                                            | 483.46 | 879.78 | 1260.29 |
| 2.     | 1:1 Co-Fe-MOF | 76.47                                                             | 257.47 | 483.46 | 815.44  |
| 3.     | 1:2 Co-Fe-MOF | 61.03                                                             | 207.78 | 379.78 | 627.57  |
| 4.     | Co-MOF        | 16.91                                                             | 27.94  | 113.97 | 258.08  |

**Table S4:** TOF values ( $s^{-1}$ ) of MOFs at various overpotentials.

| S. No. | MOFs          | TOF values at different overpotentials |        |        |
|--------|---------------|----------------------------------------|--------|--------|
|        |               | 320 mV                                 | 370 mV | 420 mV |
| 1.     | 2:1 Co-Fe-MOF | 8.48                                   | 26.83  | 48.36  |
| 2.     | 1:1 Co-Fe-MOF | 6.05                                   | 19.05  | 41.16  |
| 3.     | 1:2 Co-Fe-MOF | 4.36                                   | 17.37  | 40.95  |
| 4.     | Co-MOF        | 0.53                                   | 4.26   | 20.27  |

**Table S5:** Evaluation of OER performances of various bimetallic MOFs with present work.

| S. No. | MOFs                                                                                                      | Substrate    | Overpotential ( $\eta$ , mV) at 10 mA. cm <sup>-2</sup> | Tafel slope (mV/dec) | References    |
|--------|-----------------------------------------------------------------------------------------------------------|--------------|---------------------------------------------------------|----------------------|---------------|
| 1.     | Ni-BTC                                                                                                    | Carbon paper | 346                                                     | 64                   | <sup>66</sup> |
| 2.     | Co-Fe-BDC                                                                                                 | GCE          | 295                                                     | 34.8                 | <sup>28</sup> |
| 3.     | Co-Fe-IDA                                                                                                 | GCE          | 265                                                     | 44                   | <sup>29</sup> |
| 4.     | Co <sub>0.6</sub> Fe <sub>0.4</sub> -MOF74 (DHTA)                                                         | GCE          | 280                                                     | 56                   | <sup>67</sup> |
| 5.     | 2:1 Co-Fe-MOF                                                                                             | GCE          | 310                                                     | 45                   | This work     |
| 6.     | Ni-Co-BTC                                                                                                 | GCE          | 330                                                     | 32                   | <sup>14</sup> |
| 7.     | FeNi@CNF                                                                                                  | GCE          | 356                                                     | 62.6                 | <sup>20</sup> |
| 8.     | Co-Fe-BDC                                                                                                 | GCE          | 238                                                     | 52                   | <sup>30</sup> |
| 9.     | [Ni <sub>2</sub> (BBTZ)(H <sub>2</sub> O) <sub>4</sub> ]V <sub>4</sub> O <sub>12</sub> ·2H <sub>2</sub> O | Carbon cloth | 353                                                     | 77.8                 | <sup>68</sup> |
| 10.    | Co <sub>0.75</sub> Fe <sub>0.25</sub> -Pyrazine                                                           | GCE          | 239                                                     | 42                   | <sup>69</sup> |

BTC: (1,3,5-benzene tricarboxylate), BDC: (1,4-benzene dicarboxylate), (3) IDA: (4,5 imidazole dicarboxylic acid), (4) DHTA: (2,5-dihydroxyterephthalic acid), (7) CNF: complex nanoflower (9) BBTZ: 1,4-bis-(1,2,4-triazol-1-ylmethyl)benzene

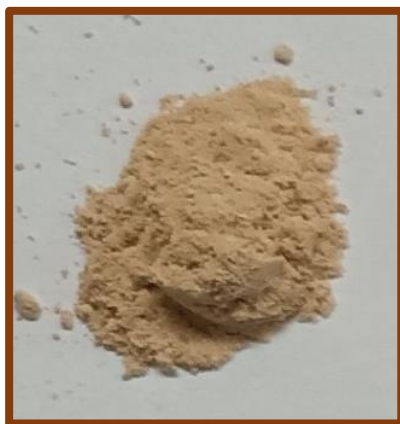

**Co-MOF**

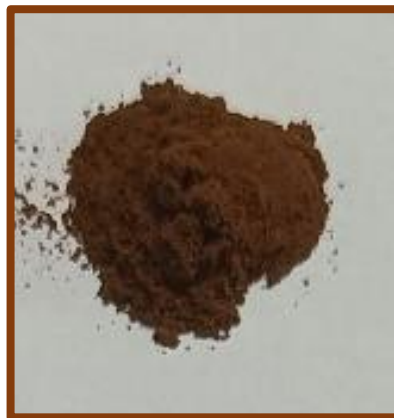

**1:1 Co-Fe-MOF**

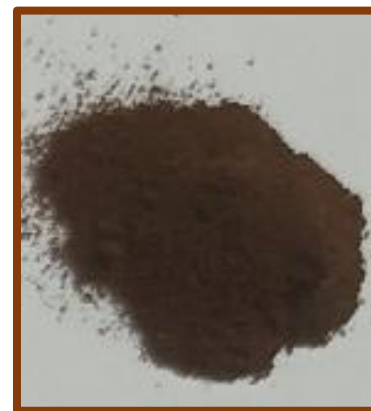

**2:1 Co-Fe-MOF**

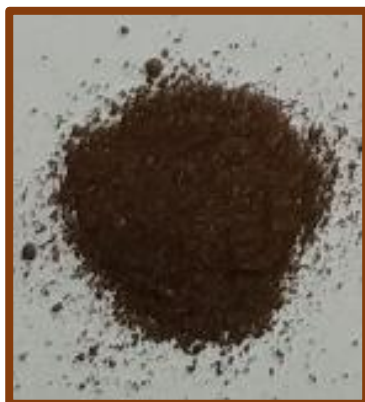

**1:2 Co-Fe-MOF**

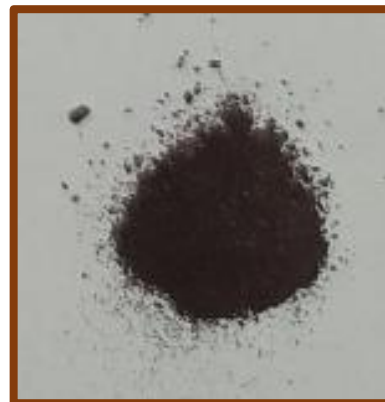

**Fe-MOF**

**Figure S1:** Digital photographs of MOFs showing the color variations.



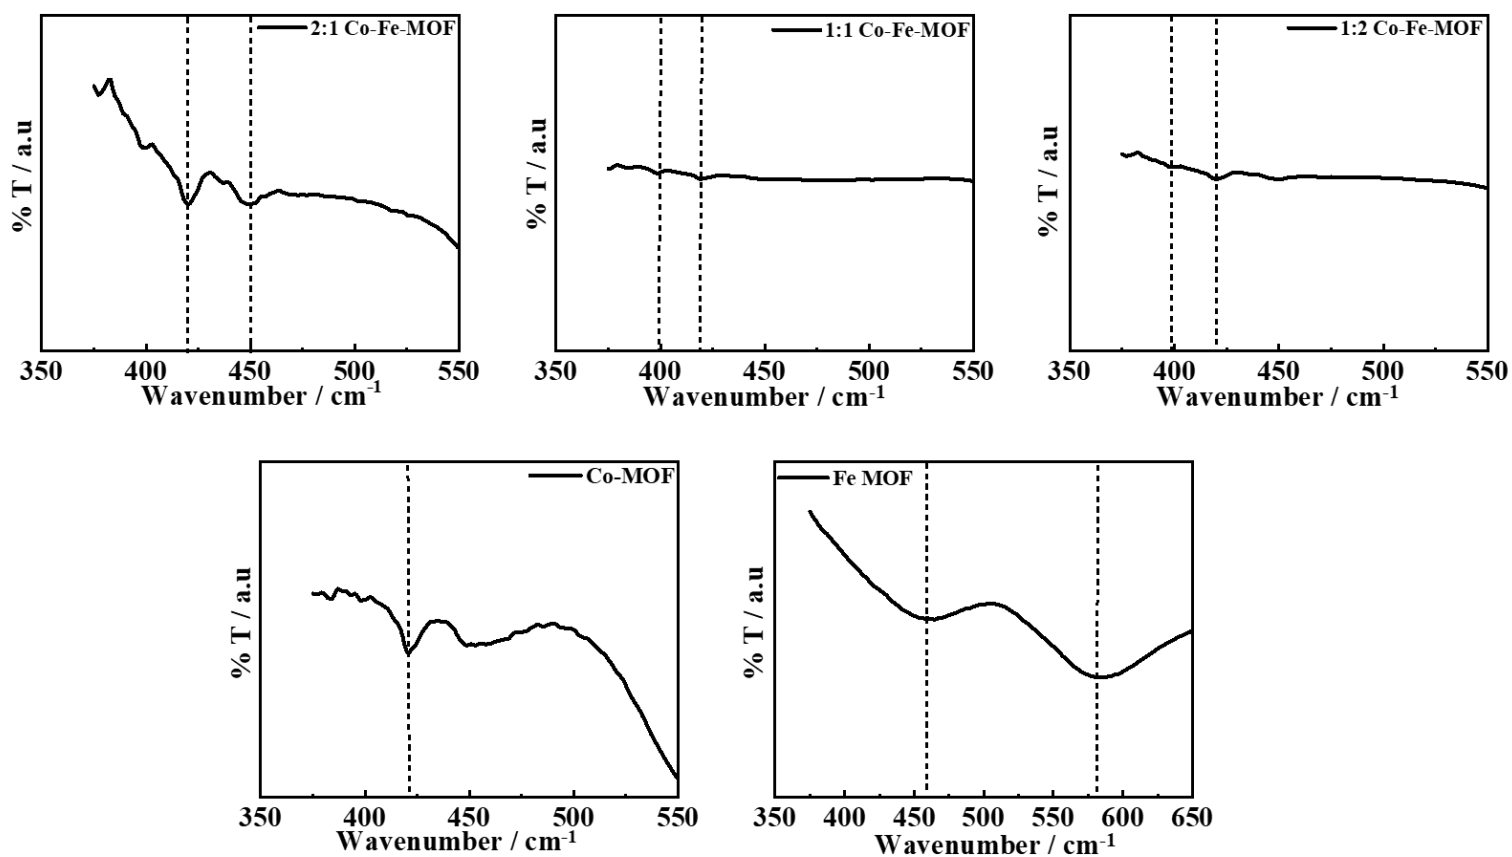

**Figure S2:** FT-IR spectra showing the presence of M-O and M-N bonds in the MOFs.

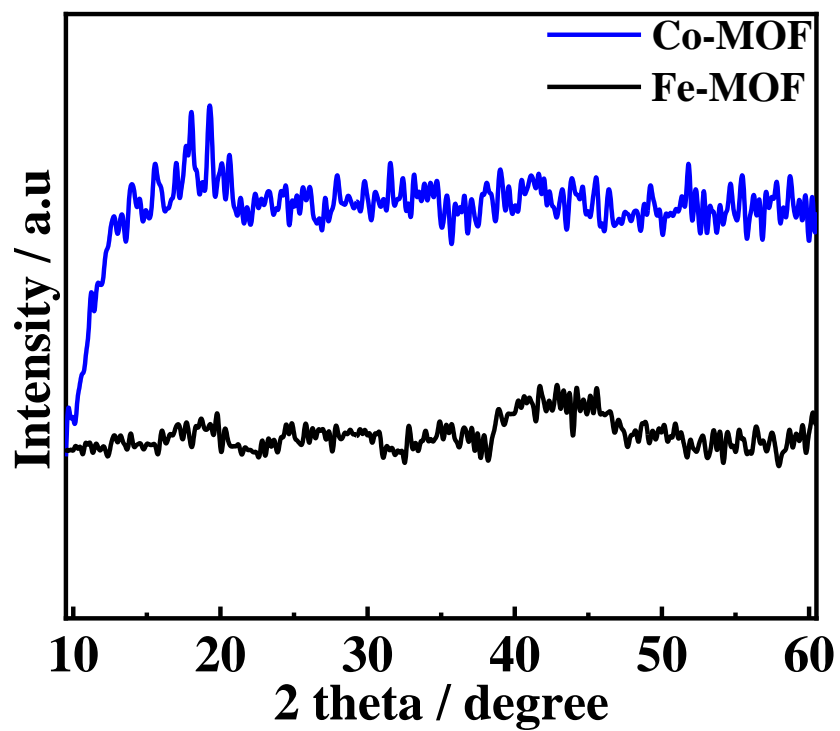

**Figure S3:** Powder XRD patterns of Co-MOF and Fe-MOF.

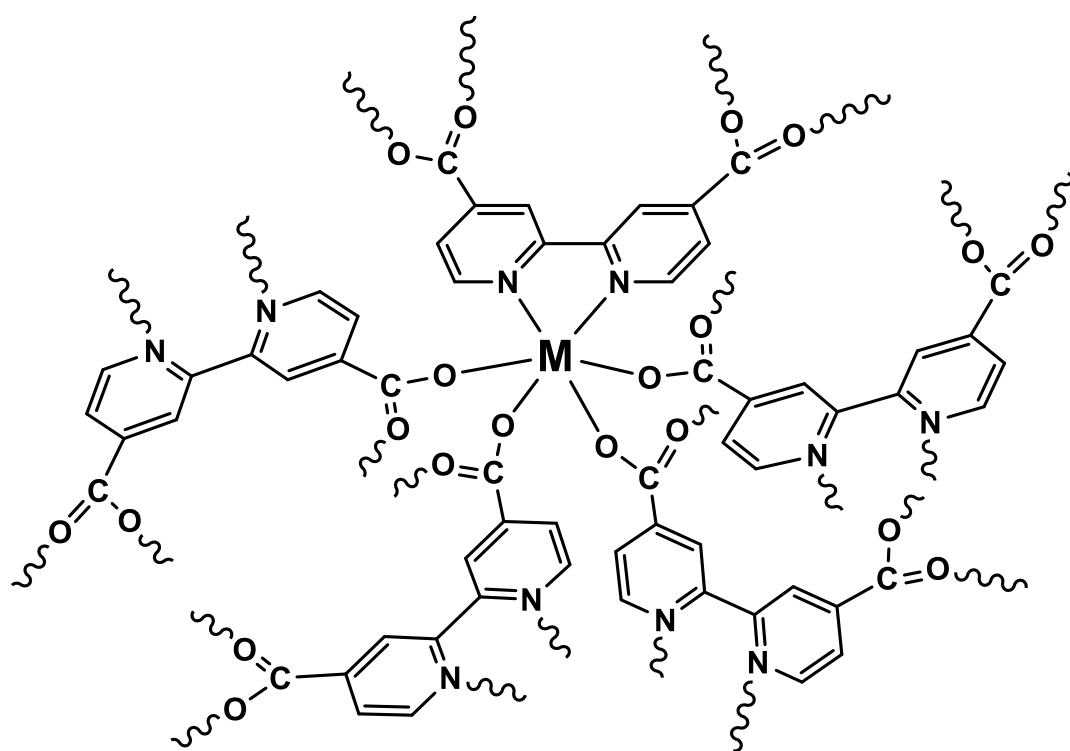

M = Co or Fe

**Figure S4:** Possible structure of the MOF

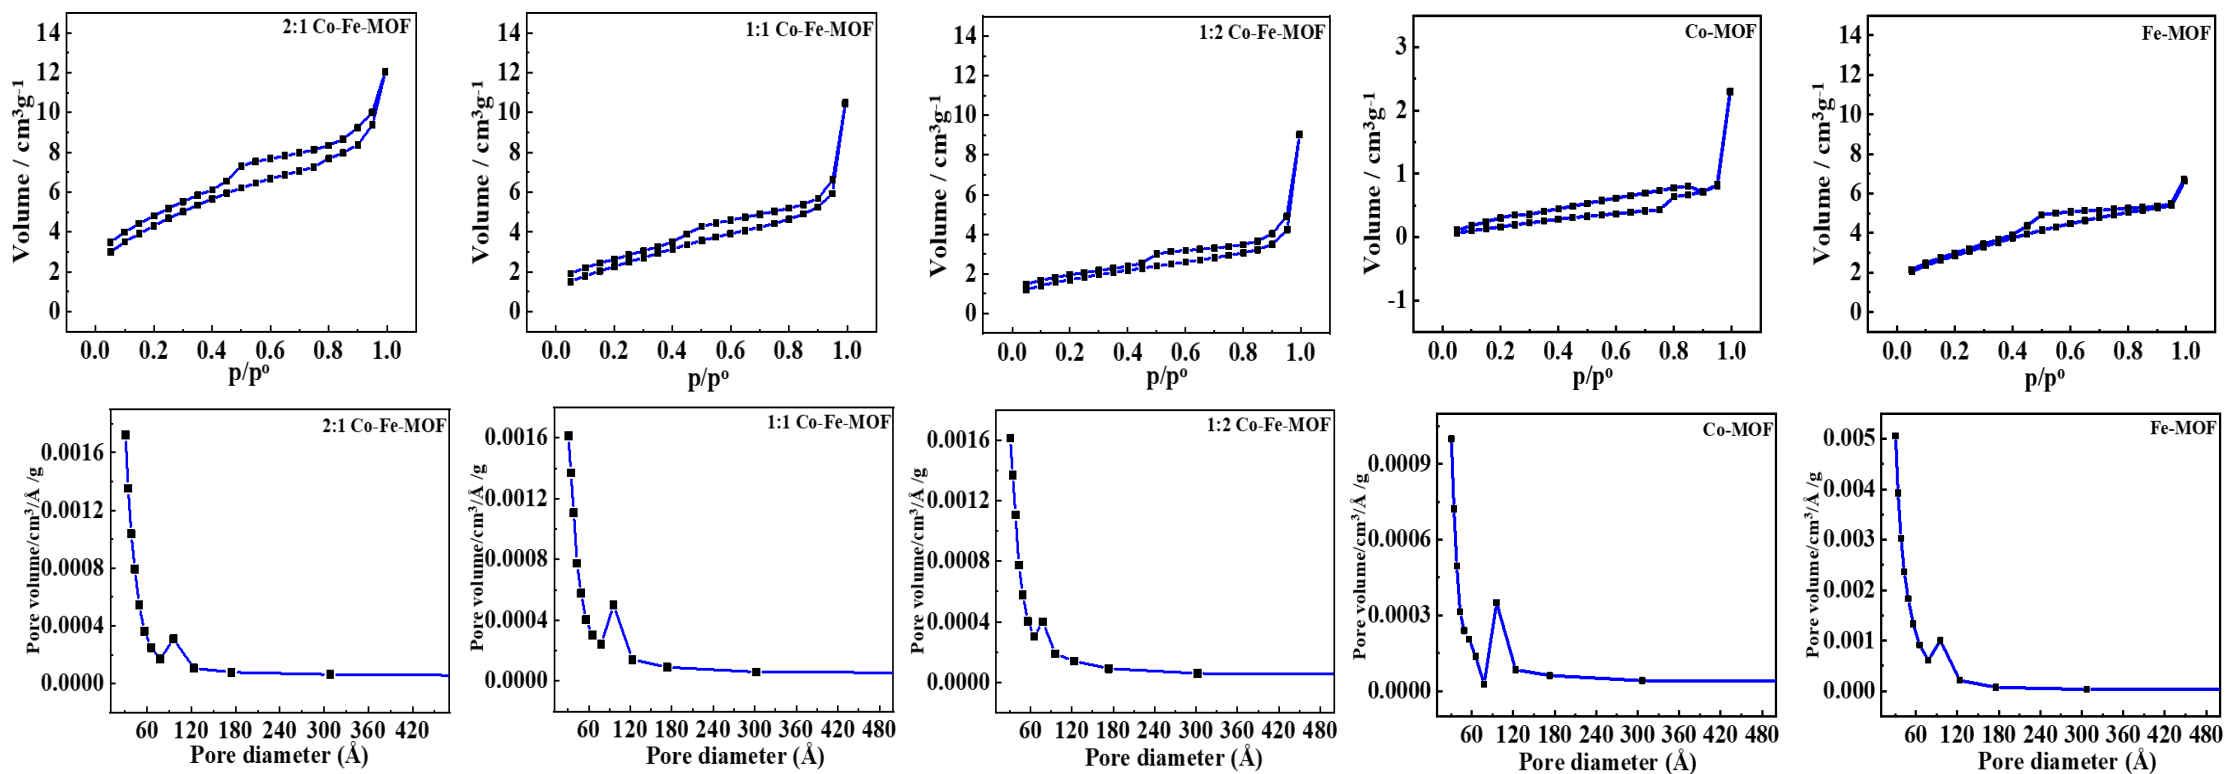

**Figure S5:** BET surface area and pore size distribution curve of MOFs.

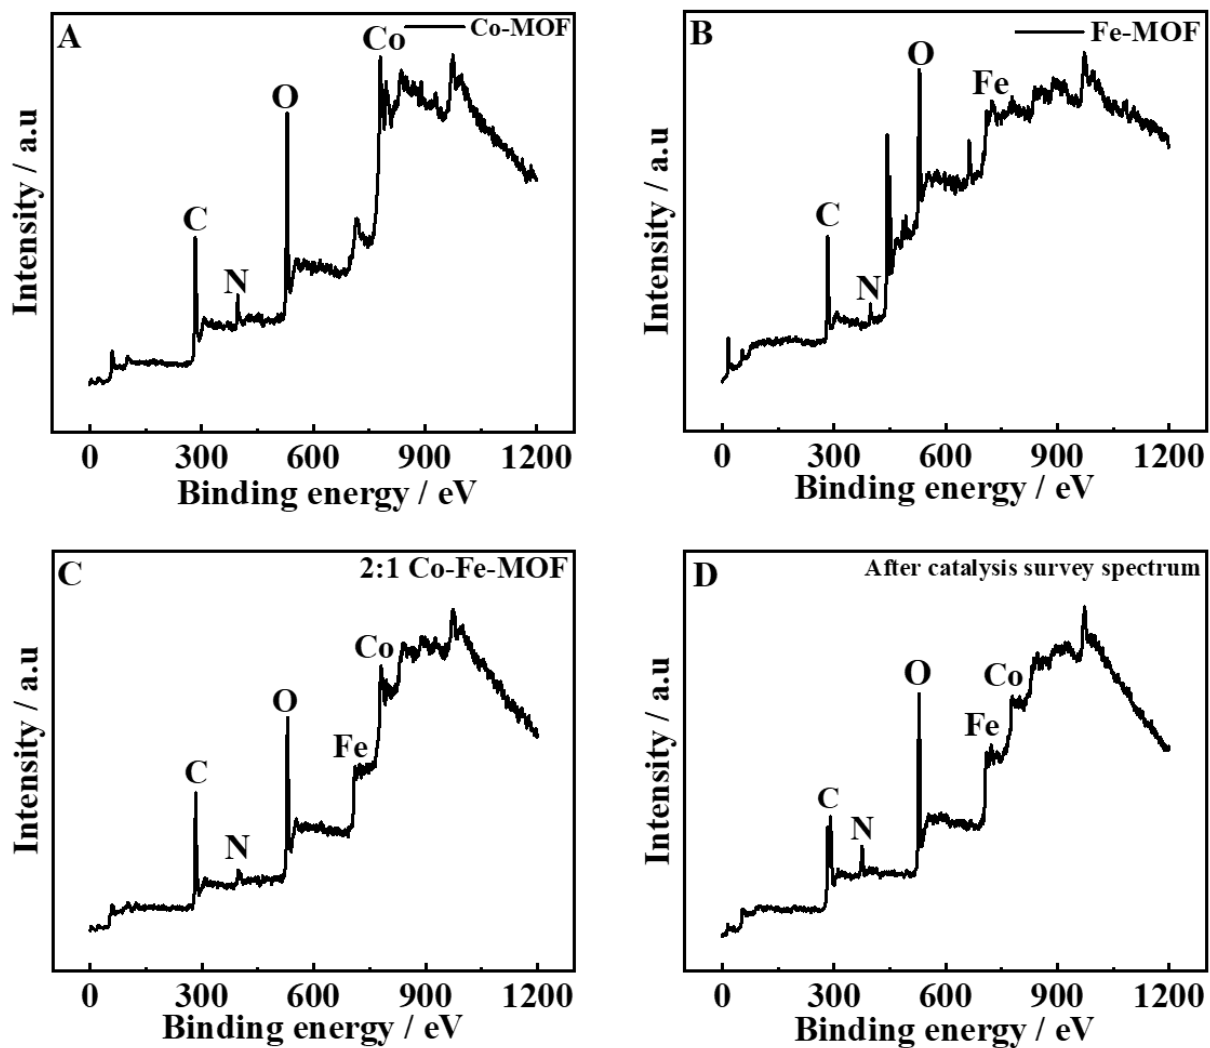

**Figure S6:** XPS survey spectra of Co-MOF (A), Fe-MOF (B), 2:1 Co-Fe-MOF (C), and after the OER catalysis 2:1 Co-Fe-MOF (D).

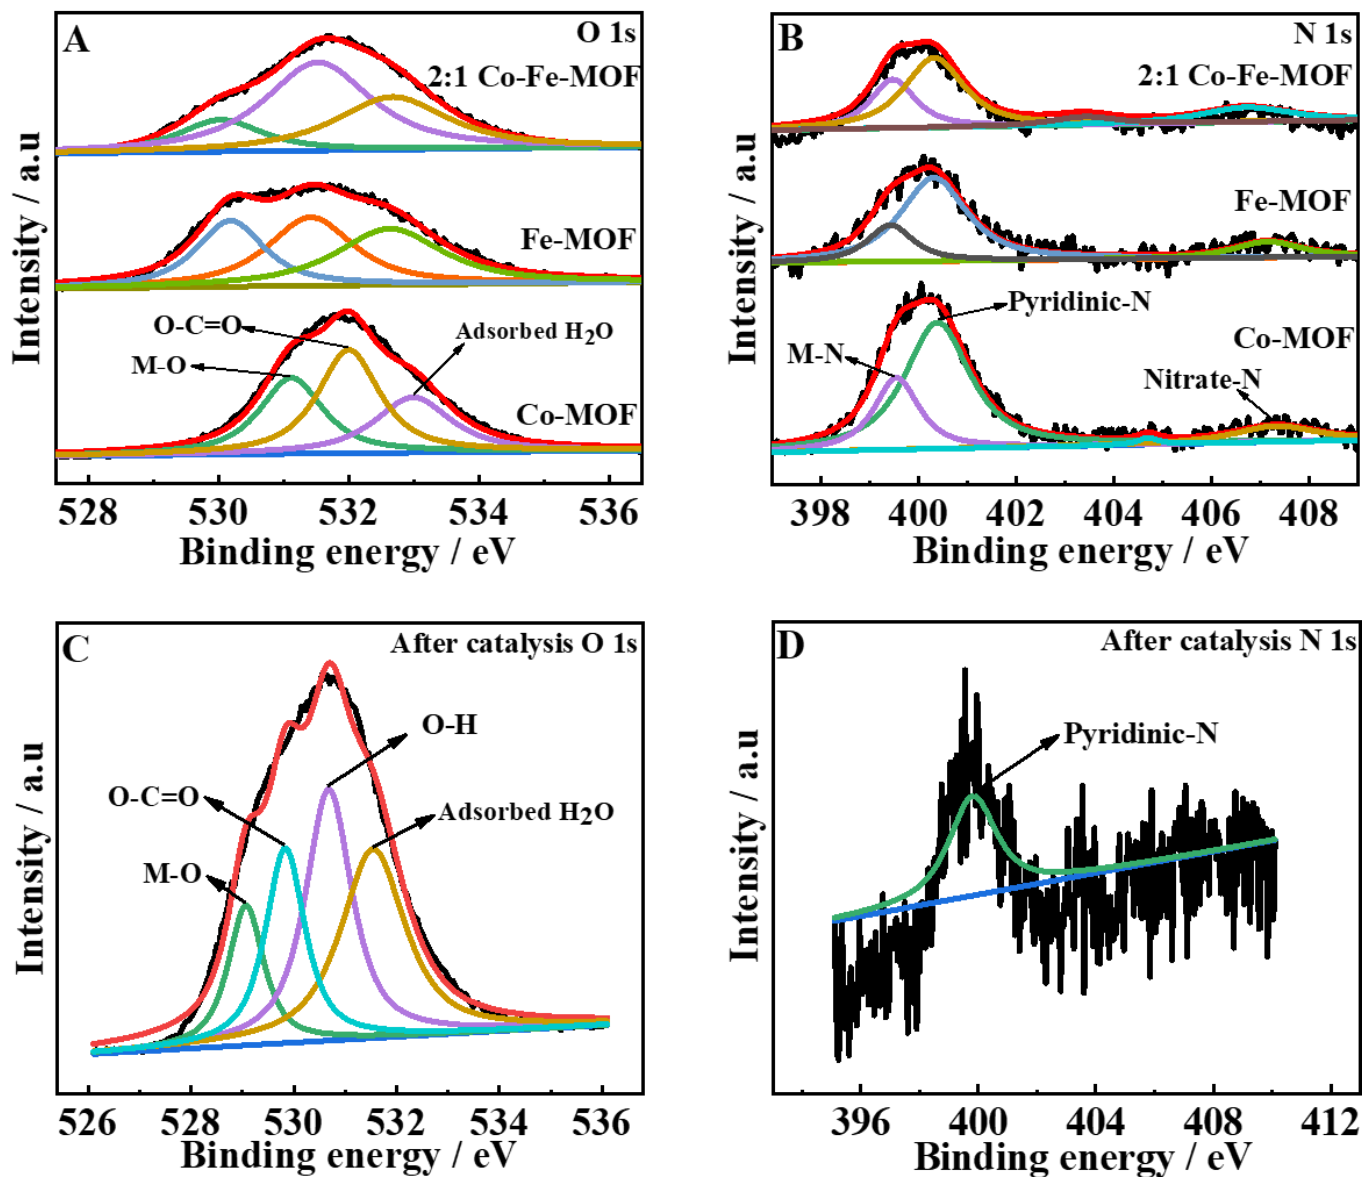

**Figure S7:** O 1s (A) and N 1s (B) XPS spectra of Co-MOF, Fe-MOF, 2:1 Co-Fe-MOF and after catalysis XPS spectra of O 1s (C) and N 1s (D) of 2:1 Co-Fe-MOF.

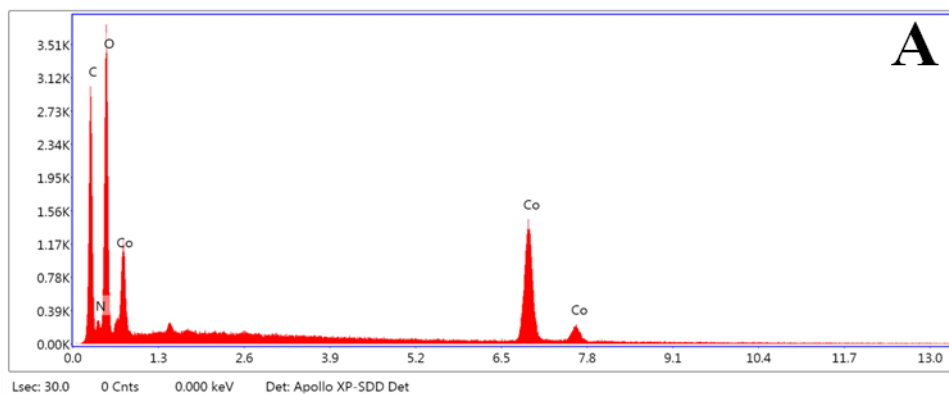

Element Weight % Atomic %

|      |      |      |
|------|------|------|
| C K  | 33.4 | 45.6 |
| N K  | 9.3  | 10.9 |
| O K  | 37.0 | 37.9 |
| Co K | 20.3 | 5.6  |

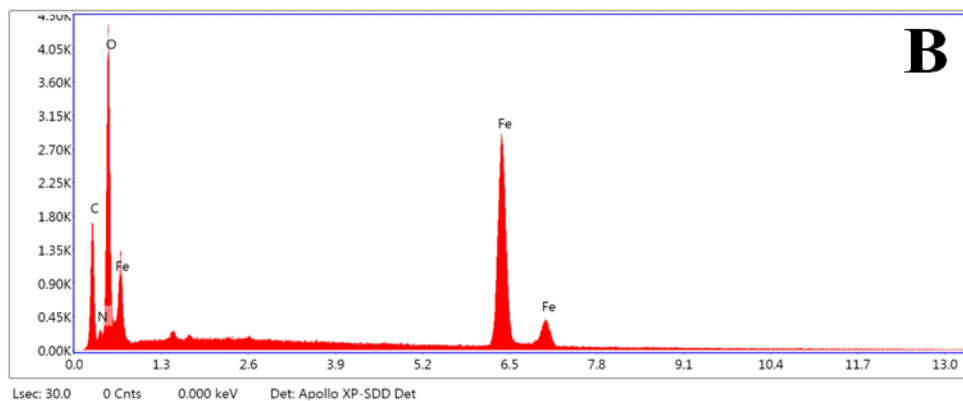

Element Weight % Atomic %

|      |      |      |
|------|------|------|
| C K  | 23.7 | 37.6 |
| N K  | 7.0  | 9.5  |
| O K  | 34.4 | 41.0 |
| Fe K | 35.0 | 12.0 |

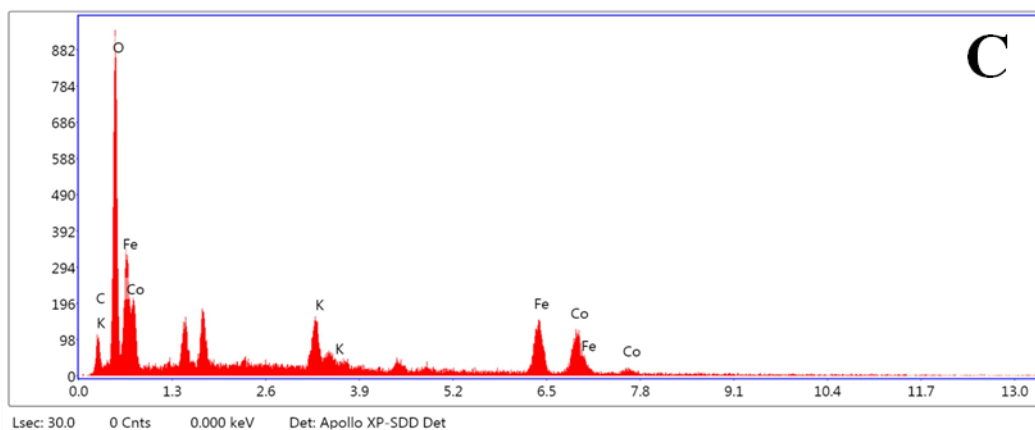

Element Weight % Atomic %

|      |      |      |
|------|------|------|
| C K  | 25.7 | 34.5 |
| N K  | 8.3  | 9.6  |
| O K  | 51.2 | 51.7 |
| K K  | 0.1  | 0.0  |
| Fe K | 5.0  | 1.5  |
| Co K | 9.7  | 2.7  |

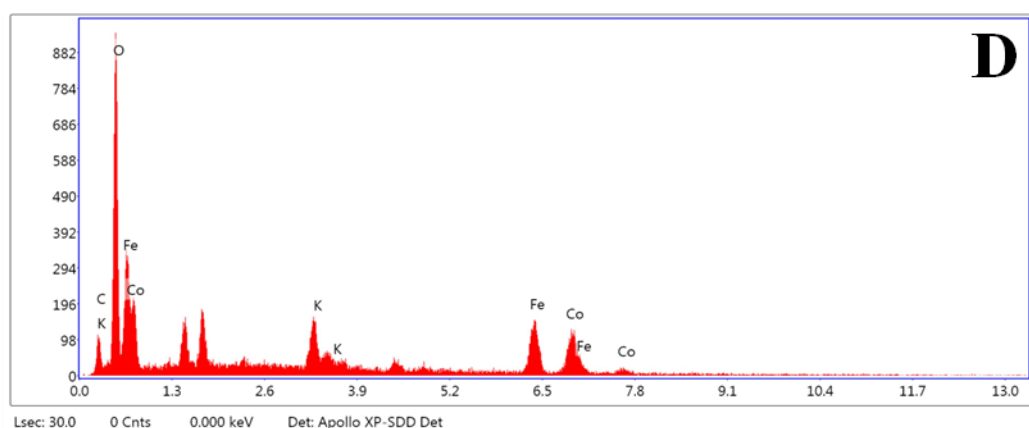

Element Weight % Atomic %

|      |      |      |
|------|------|------|
| C K  | 21.6 | 25.9 |
| O K  | 51.5 | 64.0 |
| K K  | 5.1  | 2.6  |
| Fe K | 7.2  | 2.6  |
| Co K | 14.7 | 5.0  |

**Fig. S8:** EDX spectra and elemental composition analyses of (A) Co-MOF, (B) Fe-MOF, (C) 2:1 Co-Fe-MOF, and (D) post-catalysis 2:1 Co-Fe MOF

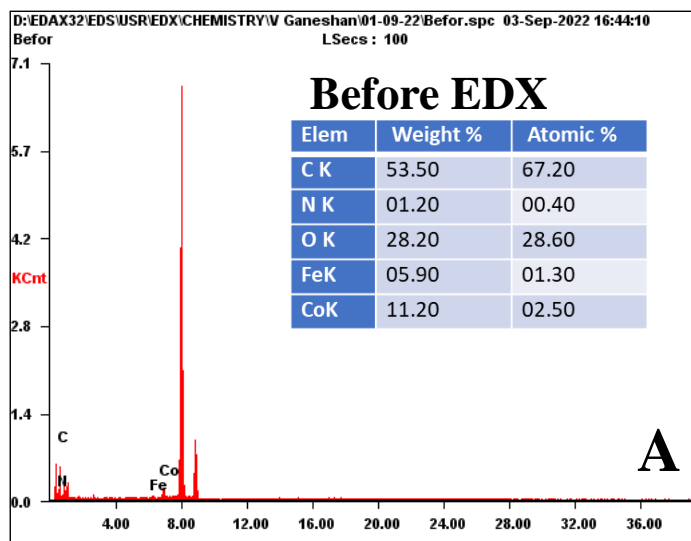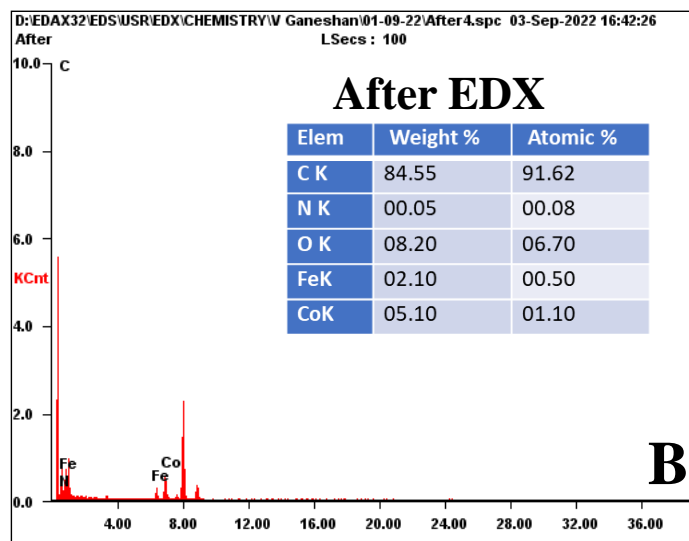

**Figure S9:** EDX spectra of 2:1 Co-Fe-MOF before (A) and after (B) OER catalysis.



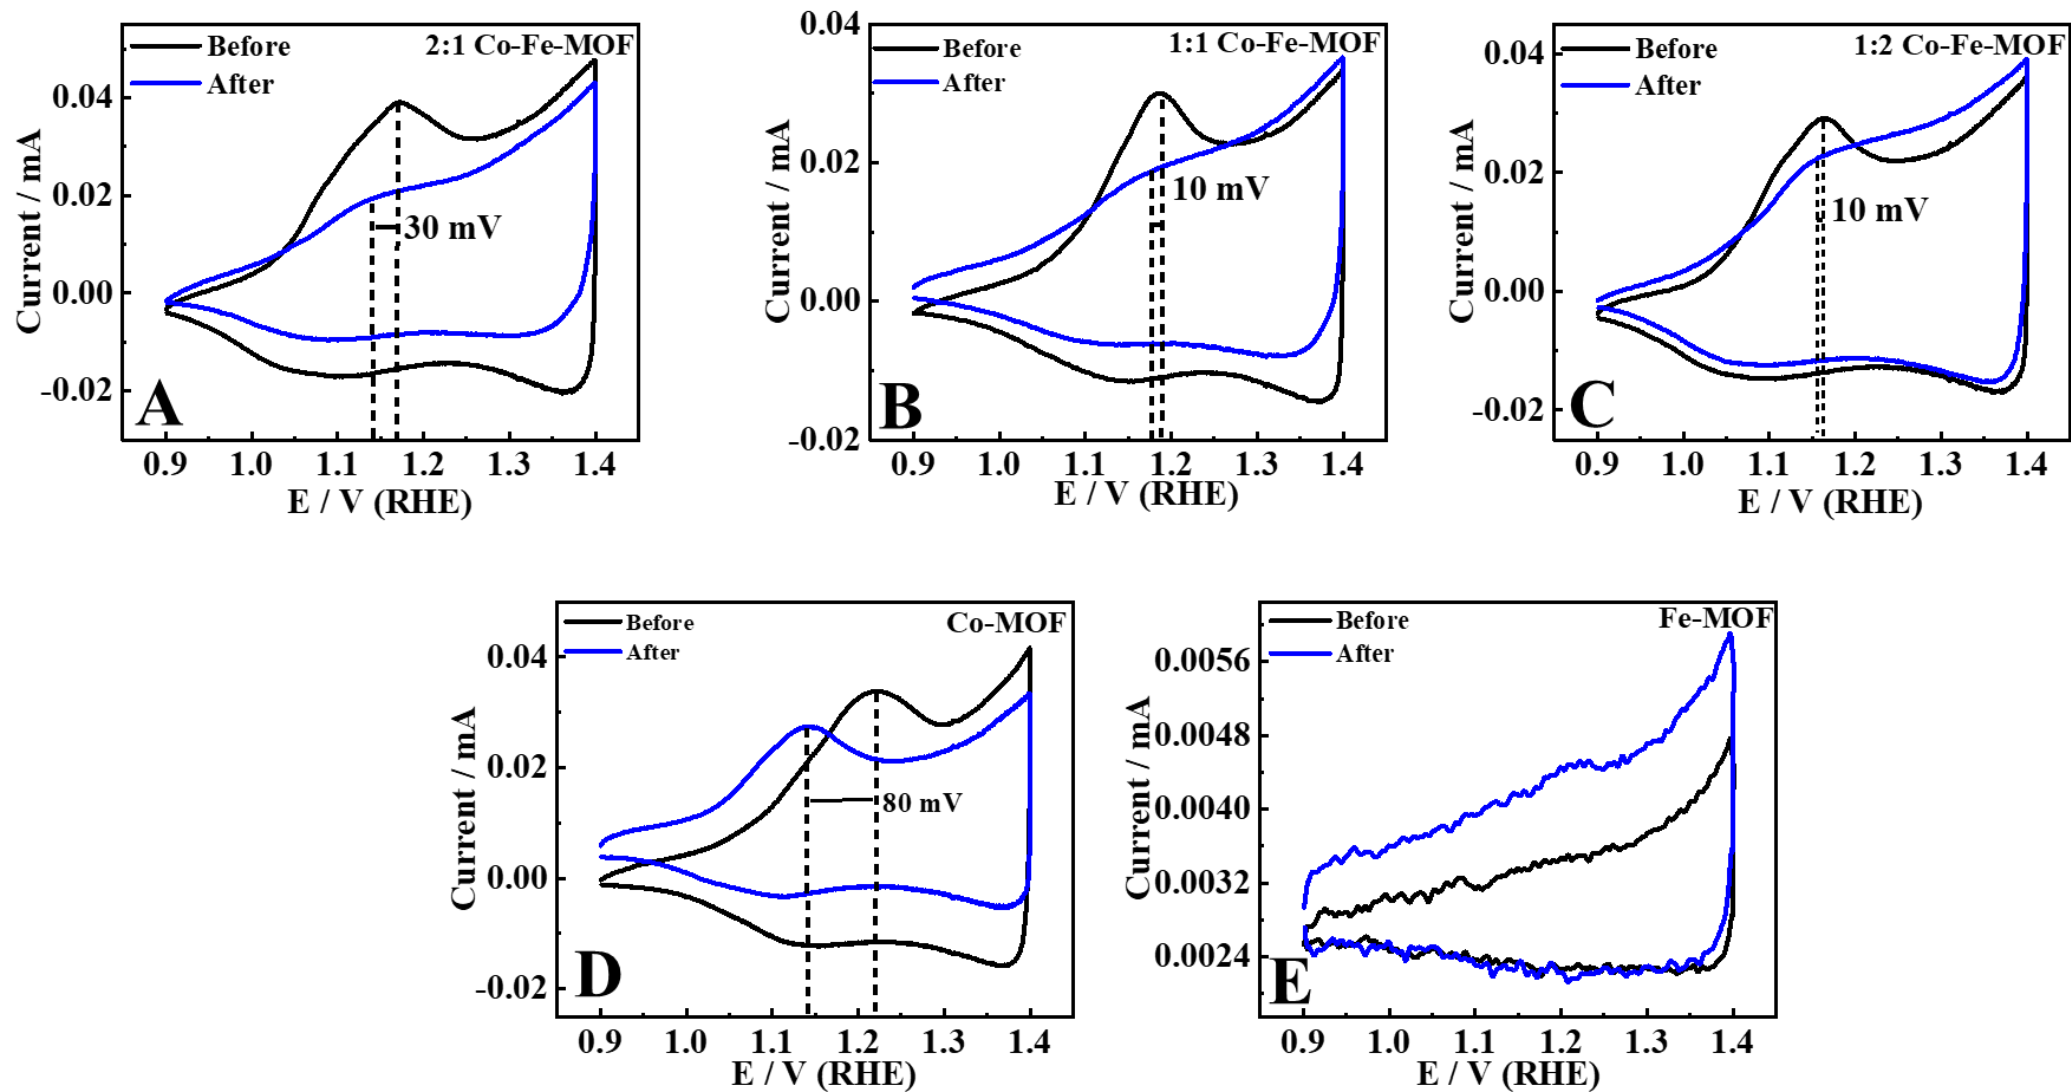

**Figure S10:** CV responses of MOFs before and after 30 consecutive CV cycles.

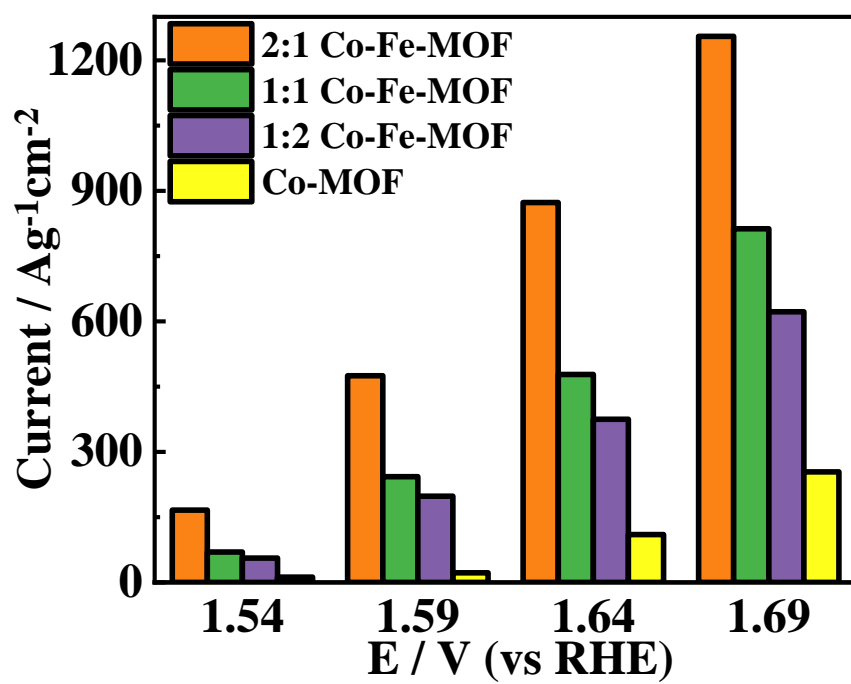

**Figure S11:** Mass activity plot of MOFs at different potentials.

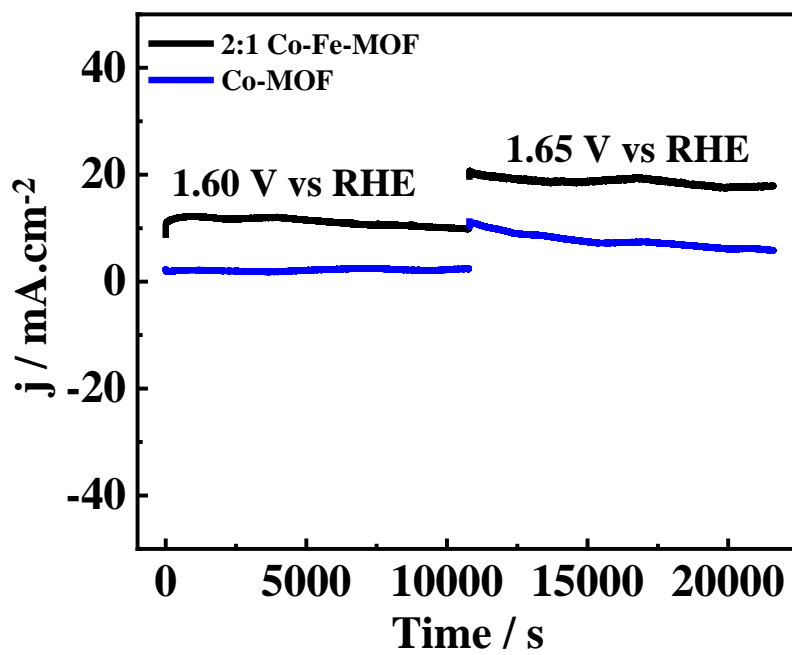

**Figure S12:** Stability test responses by amperometry 2:1 Co-Fe-MOF and Co-MOF at 1.60 V and 1.65 V vs RHE for three hours each.

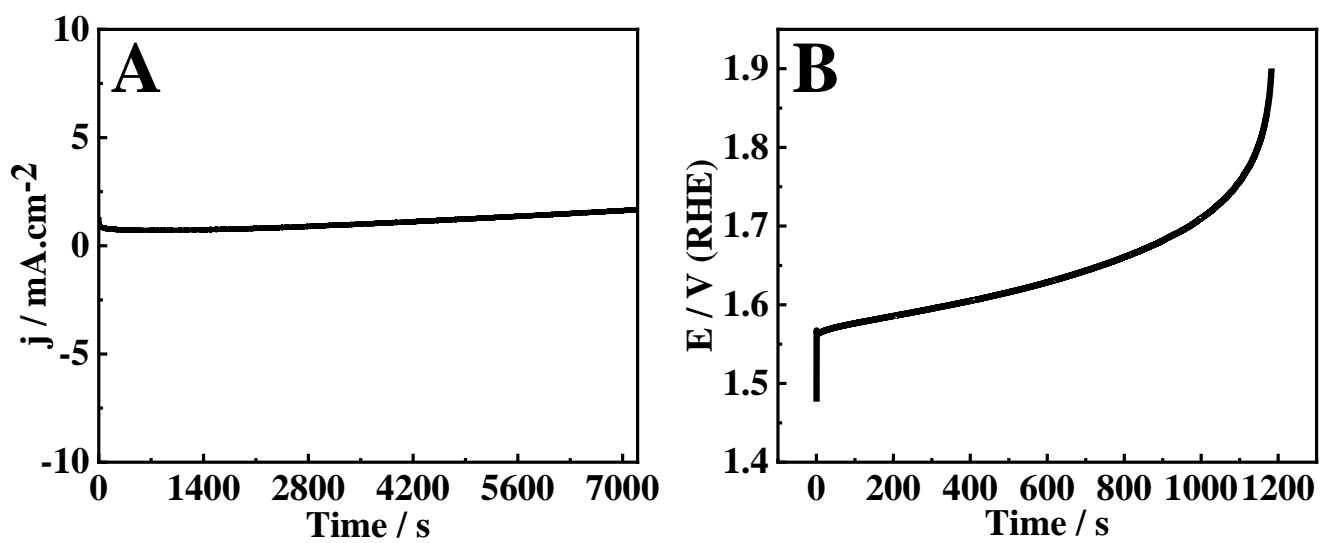

**Figure S13:** Stability test responses by amperometry (A) and chronopotentiometry (B) of GC<sub>RDE</sub>/RuO<sub>2</sub>.

## References

**S1:**S. Anantharaj, P. E. Karthik and S. Kundu, Petal-like hierarchical array of ultrathin Ni(OH)<sub>2</sub> nanosheets decorated with Ni(OH)<sub>2</sub> nanoburls: A highly efficient OER electrocatalyst, *Catal. Sci. Technol.*, 2017, **7**, 882–893.
